# Supplementary material for: Self-Supervised Learning Improves Accuracy and Data Efficiency for IMU-Based Ground Reaction Force Estimation
Source: PubMed Central journal article supplement (PMC10849467; doi:10.1101/2023.10.25.564057), 2024-01-25
Supplement: media-1.pdf [file media-1.pdf]

Supplementary Table I RMSE between the Gold-Standard and Estimated GRF for SSL Pre-trained Model during Stance, Swing Phases of Walking and Landing, Flight Phases of Drop Landing.

| Dataset            | Phase   | RMSE ( <i>N/kg</i> ) |                    |                   |
|--------------------|---------|----------------------|--------------------|-------------------|
|                    |         | mlGRF <sup>a</sup>   | apGRF <sup>a</sup> | vGRF <sup>a</sup> |
| Overground Walking | Stance  | 0.04±0.01            | 0.03±0.01          | 0.13±0.03         |
|                    | Swing   | 0.01±0.01            | 0.01±0.00          | 0.05±0.02         |
| Treadmill Walking  | Stance  | 0.02±0.00            | 0.03±0.01          | 0.12±0.02         |
|                    | Swing   | 0.01±0.00            | 0.01±0.00          | 0.06±0.01         |
| Drop Landing       | Landing | 0.04±0.01            | 0.05±0.01          | 0.19±0.05         |
|                    | Flight  | 0.01±0.00            | 0.01±0.00          | 0.05±0.02         |

<sup>a</sup> ml: medial-lateral; ap: anterior-posterior; v: vertical
